# Supplementary material for: TBAB additive for inorganic CsPbI2.4Br0.6 perovskite solar cells with efficiency beyond 15%
Source: Royal Society of Chemistry journal article supplement (doi:10.1039/c9tc02362c), 2019-01-01
Supplement: c9tc02362c1.pdf [file c9tc02362c1.pdf]

## Supporting Information

### **TBAB additive for inorganic CsPbI<sub>2.4</sub>Br<sub>0.6</sub> perovskite solar cells with efficiency beyond 15%**

*Xue Jia,<sup>\*ab</sup> Ling Liu<sup>ab</sup> and Zhimin Fang<sup>a</sup>*

a. X. Jia, L. Liu, Z. Fang

Center for Excellence in Nanoscience (CAS), Key Laboratory of Nanosystem and Hierarchical Fabrication (CAS), National Center for Nanoscience and Technology, Beijing 100190, China

E-mail: [jjax@nanoctr.cn](mailto:jjax@nanoctr.cn)

b. X. Jia, L. Liu

University of Chinese Academy of Sciences, Beijing 100049, China

## Experimental section

### 1. Materials and precursor solution preparation

SnO<sub>2</sub>-colloid precursor (tin(IV) oxide, 15% in H<sub>2</sub>O colloidal dispersion), N,N-dimethylformamide (DMF, 99.8%), dimethyl sulfoxide (DMSO, >99.8%), Chlorobenzene (CB, 99.9%), Molybdenum(VI) oxide (MoO<sub>3</sub>, 99.998%) and silver (Ag, 99.99%) were purchased from Alfa Aesar. Zinc acetate dihydrate (>99%), ethanolamine (99.5%), cesium iodide (CsI, 99.999%) and lead bromide (PbBr<sub>2</sub>, 99.999%) were purchased from Sigma-Aldrich. Lead iodide (PbI<sub>2</sub>, 99.99%) and 2-methoxyethanol (>99.0%) were purchased from TCI. Tetrabutylammonium bromide (TBAB, >99%) was purchased from Acros. Poly[bis(4-phenyl)(2,4,6-trimethylphenyl)amine] (PTAA) was purchased from Xi'an Polymer Light Technology Corp. Unless otherwise stated, all solvents and chemicals were used without further purification.

### 2. Precursor solution preparation

The ZnO precursor solution was prepared according to literature [1].

The CsPbI<sub>2.4</sub>Br<sub>0.6</sub> precursor solution (0.8 M) was prepared by dissolving CsI (0.8 M), PbI<sub>2</sub> (0.56 M) and PbBr<sub>2</sub> (0.24 M) in a mixture of DMF and DMSO (v/v 4:1), then, was stirred at 60 °C overnight in a N<sub>2</sub> glovebox.

A certain amount of TBAB was dissolved in DMF and stirred for 2 h at room temperature.

The CsPbI<sub>2.4</sub>Br<sub>0.6</sub>-TBAB precursor solution was prepared by adding TBAB DMF solution to the above CsPbI<sub>2.4</sub>Br<sub>0.6</sub> precursor solution, and stirred for 2 h.

The PTAA solution was prepared by dissolving PTAA (10 mg) in 1 mL of CB solution.

The PC<sub>61</sub>BM solution was prepared by dissolving PC<sub>61</sub>BM (15 mg) in 1 mL of CB solution.

### 3. Device fabrication

#### Perovskite solar cells

Perovskite solar cells were fabricated with the structure of ITO/SnO<sub>2</sub>/ZnO/PVSK/PTAA/MoO<sub>3</sub>/Ag. Patterned ITO substrates with a sheet resistance of 15 Ω sq<sup>-1</sup> were ultrasonically cleaned by using detergent, deionized water, acetone, isopropanol sequentially, and then treated with UV-ozone for 10min. A thin layer of SnO<sub>2</sub> nanoparticle film was obtained by annealing the substrates at 150 °C for 30 min after spin-coated at 3000 rpm for 30s. Then, the ZnO precursor solution was spin-coated onto substrates (4000 rpm for 30 s). The films were annealed at 200 °C in the air for 20 min. Next, the different perovskite precursor solutions were spin-coated onto ITO/SnO<sub>2</sub>/ZnO substrates at 2000 rpm for 40s, respectively. Subsequently, the films were annealed at 320 °C for 10 min. PTAA layer was formed by spin-coating the related precursor onto the perovskite film. Finally, MoO<sub>3</sub> (~6 nm) and Ag (~80 nm) was successively evaporated onto the substrates through a shadow mask (pressure ca. 10<sup>-4</sup> Pa). The active area for the device is 0.04 cm<sup>2</sup>.

#### Electron-only devices

The structure for electron-only devices is ITO/SnO<sub>2</sub>/ZnO/perovskite/PC<sub>61</sub>BM/Ag. SnO<sub>2</sub>, ZnO, and perovskite layer were successively spin-coated onto the ITO substrates. The processes are just the same as those of PSCs fabrication. PC<sub>61</sub>BM layer was formed by spin-coating the related precursor onto the perovskite film (4000 rpm for 30 s). Finally, Ag (~80 nm) was evaporated onto the substrates through a shadow mask (pressure ca. 10<sup>-4</sup> Pa). *J-V* curves were measured by using a computerized Keithley 2400 SourceMeter in the dark.

### 4. Characterization

Absorption spectra were measured with a Shimadzu UV-1800 spectrophotometer. Photoluminescence (PL) spectra were recorded on NanoLOG-TCSPC. The 410 nm light was applied as the photon excitation light. X-ray diffraction (XRD) patterns were obtained on

D/MAX-TTRIII (CBO) with Cu K $\alpha$  radiation ( $\lambda = 1.542 \text{ \AA}$ ) operating at 40 kV and 200 mA. Scanning electron microscopy (SEM) was performed on a Hitachi SU8220. The grain size was estimated using Nano Measure software.  $J$ - $V$  curves were measured by using a computerized Keithley 2400 SourceMeter and a Xenon-lamp-based solar simulator (Enli Tech, AM 1.5G,  $100 \text{ mW cm}^{-2}$ ). The illumination intensity of solar simulator was determined by using a monocrystalline silicon solar cell (Enli SRC2020,  $2\text{cm}\times 2\text{cm}$ ) calibrated by NIM. The devices were measured in reverse scan (1.3 to  $-0.20 \text{ V}$ , step  $0.02 \text{ V}$ ). The external quantum efficiency (EQE) spectra were measured by using a QE-R3011 measurement system (Enli Tech).

## References

- [1] Sun Y, Seo JH, Takacs CJ et al. Inverted polymer solar cells integrated with a low-temperature-annealed sol-gel-derived ZnO film as an electron transport layer. *Adv Mater* 2011; 23:1679-1683.

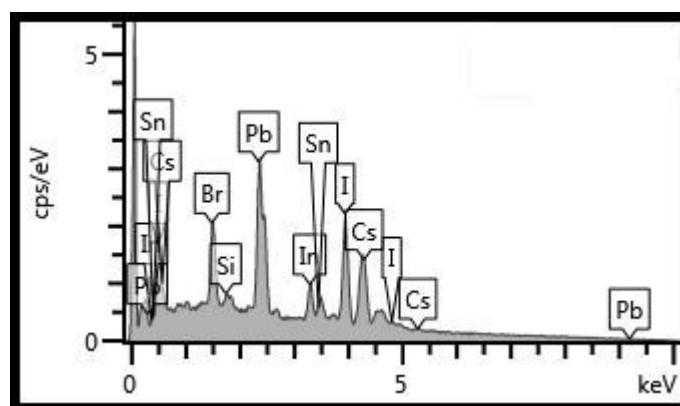

**Fig. S1** EDS pattern for the CsPbI<sub>2.4</sub>Br<sub>0.6</sub>-TBAB film.

**Table S1** The element contents for the CsPbI<sub>2.4</sub>Br<sub>0.6</sub>-TBAB film.

| Element       | Cs    | Pb    | I     | Br    |
|---------------|-------|-------|-------|-------|
| Content (at%) | 18.76 | 17.05 | 40.14 | 10.19 |

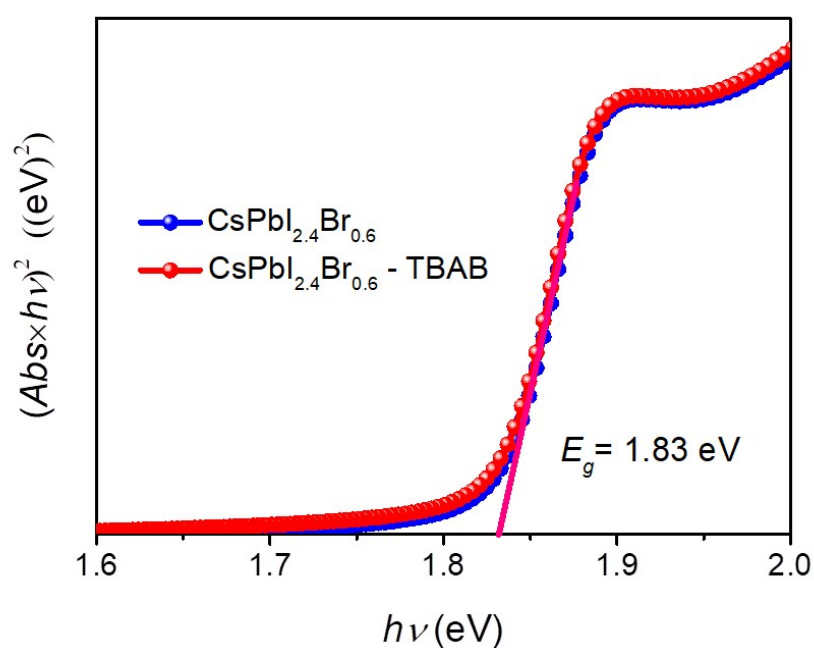

**Fig. S2** Tauc plots of CsPbI<sub>2.4</sub>Br<sub>0.6</sub> and CsPbI<sub>2.4</sub>Br<sub>0.6</sub> - TBAB films possessing a direct bandgap.

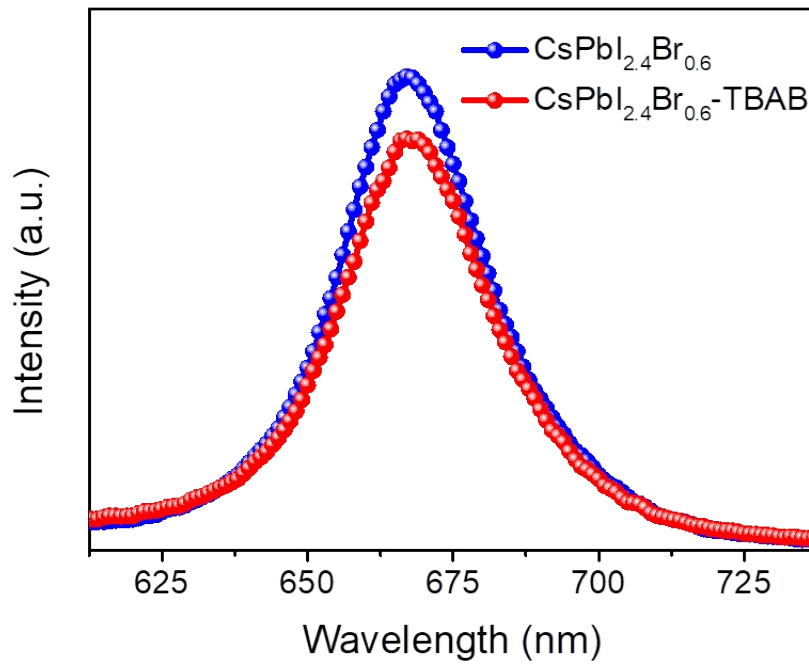

**Fig. S3** PL spectra for glass/SnO<sub>2</sub>/ZnO/CsPbI<sub>2.4</sub>Br<sub>0.6</sub> and glass/SnO<sub>2</sub>/ZnO/CsPbI<sub>2.4</sub>Br<sub>0.6</sub> - TBAB.

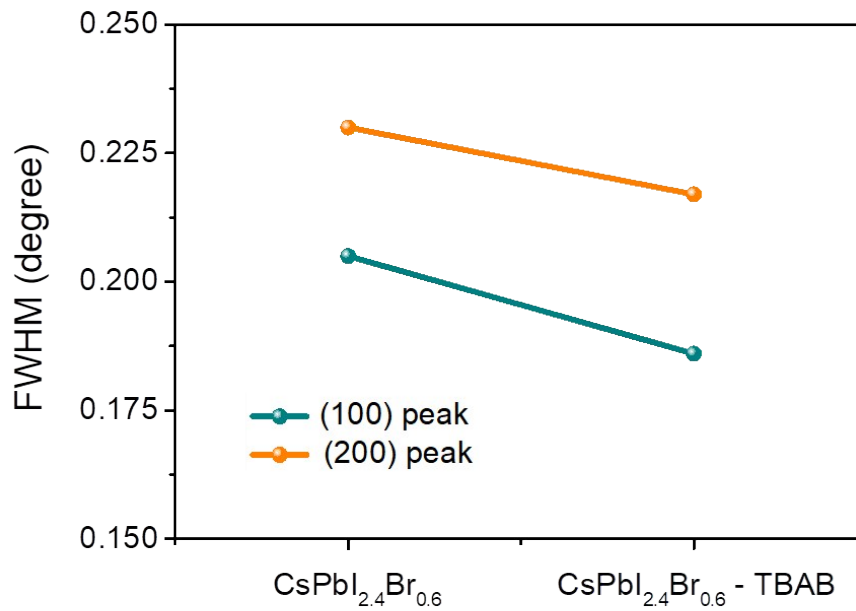

**Fig. S4** FWHM of the (100) and (200) peak for CsPbI<sub>2.4</sub>Br<sub>0.6</sub> and CsPbI<sub>2.4</sub>Br<sub>0.6</sub> - TBAB films.

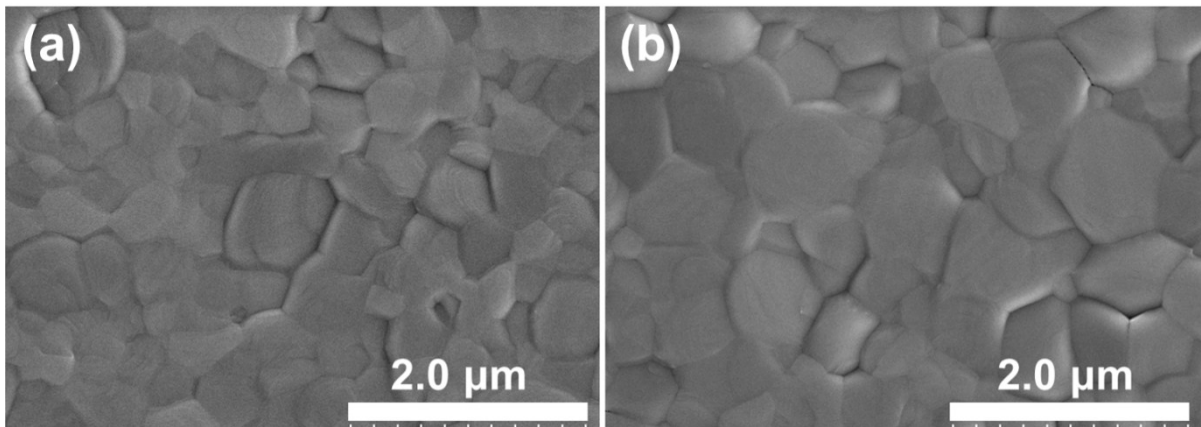

**Fig. S5** SEM images for CsPbI<sub>2.4</sub>Br<sub>0.6</sub> and CsPbI<sub>2.4</sub>Br<sub>0.6</sub> - TBAB films on glass/ITO/SnO<sub>2</sub>/ZnO substrates.

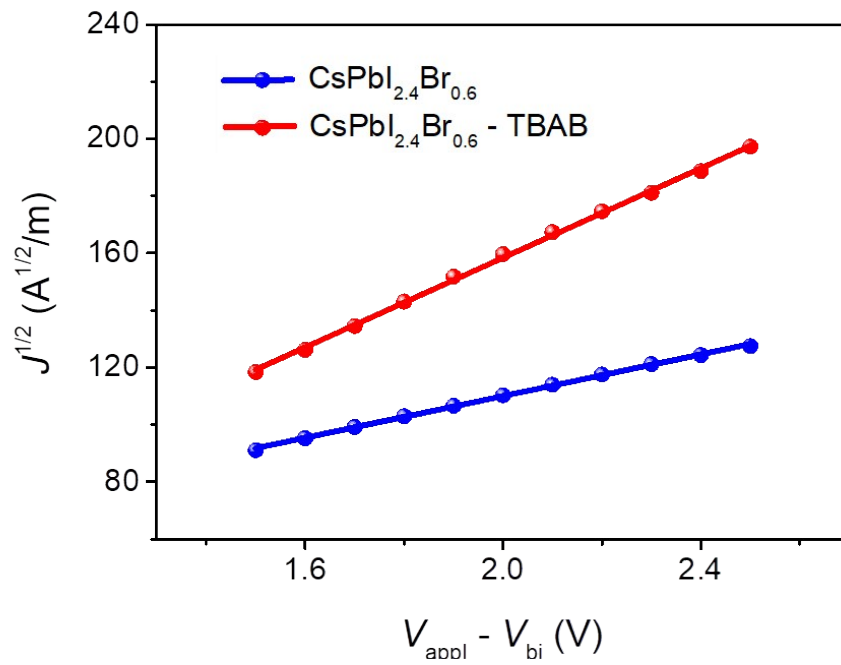

**Fig. S6**  $J^{1/2}$ - $V$  plots for the electron-only devices (in dark).

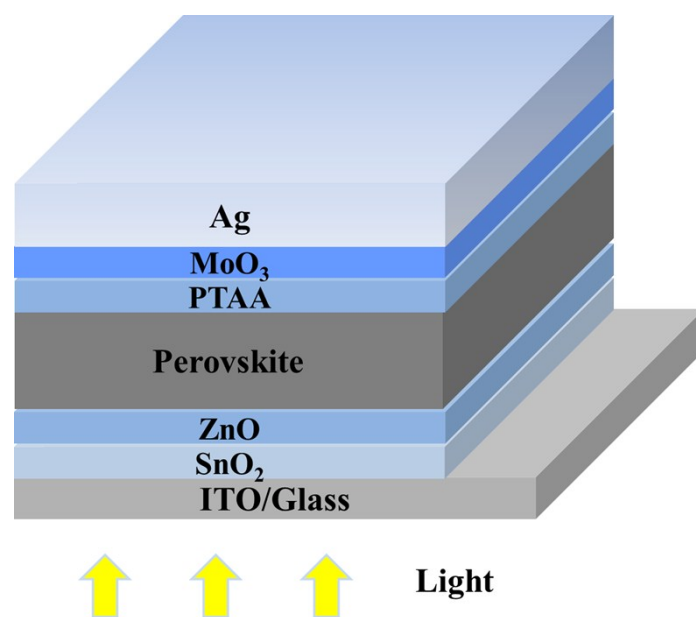

**Fig. S7** Structure of perovskite solar cells.

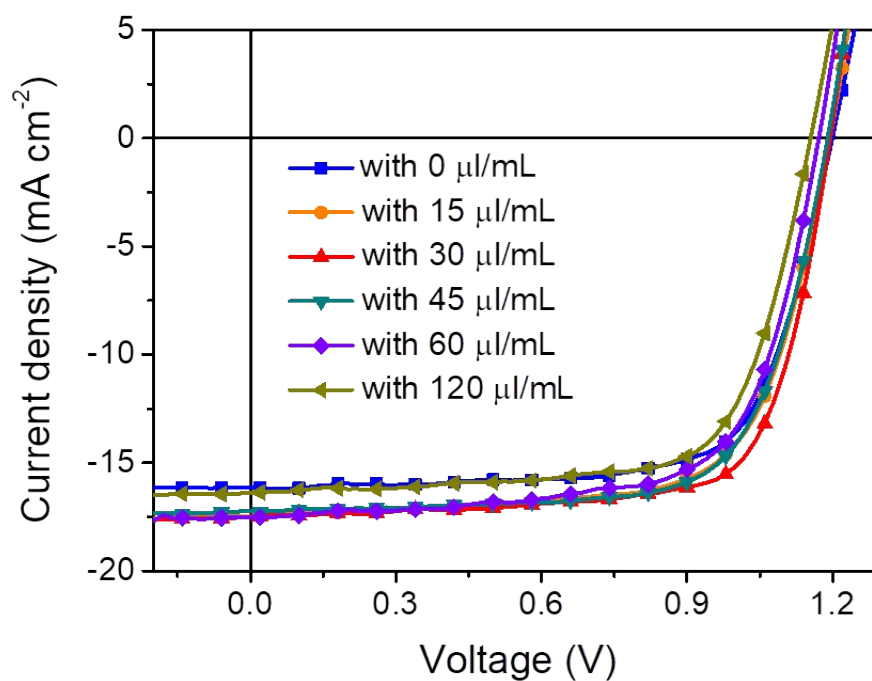

**Fig. S8** *J-V* curves for CsPbI<sub>2.4</sub>Br<sub>0.6</sub> solar cells made with different additive concentrations (annealing temperature 320 °C, annealing time 10 min).



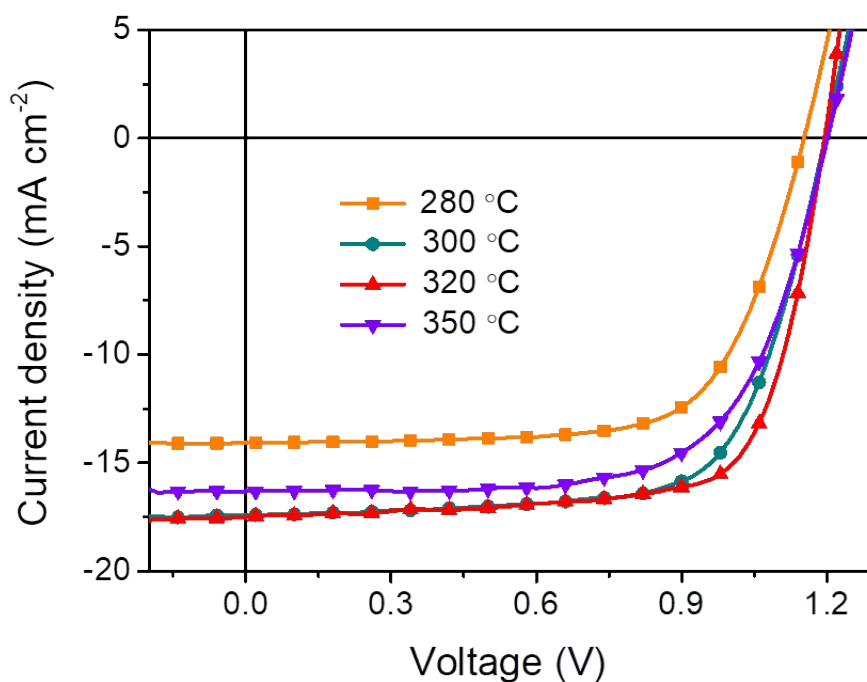

**Fig. S9**  $J$ - $V$  curves for CsPbI<sub>2.4</sub>Br<sub>0.6</sub> solar cells with different annealing temperature (30  $\mu$ l/mL TBAB, annealing time 10 min).

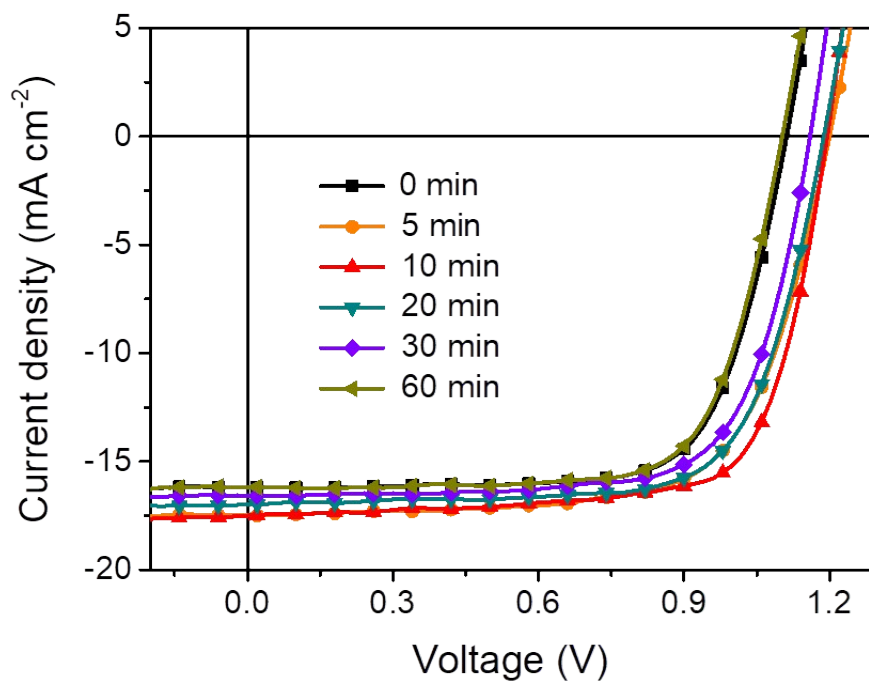

**Fig. S10**  $J$ - $V$  curves for CsPbI<sub>2.4</sub>Br<sub>0.6</sub> solar cells with different annealing time (30  $\mu$ l/mL TBAB, annealing temperature 320 °C).

**Table S2** Effect of TBAB content in precursor solution on performance of CsPbI<sub>2.4</sub>Br<sub>0.6</sub> solar cells.<sup>a</sup>

| TBAB<br>[ $\mu\text{L}/\text{mL}$ ] | $V_{\text{oc}}$<br>[V] | $J_{\text{sc}}$<br>[mA cm <sup>-2</sup> ] | FF<br>[%] | PCE<br>[%]                   |
|-------------------------------------|------------------------|-------------------------------------------|-----------|------------------------------|
| 0                                   | 1.20                   | 16.16                                     | 70.94     | 13.75 ( 13.60 ) <sup>b</sup> |
| 15                                  | 1.19                   | 17.48                                     | 69.00     | 14.41 ( 14.22 )              |
| 30                                  | 1.20                   | 17.50                                     | 72.75     | 15.21 ( 15.05 )              |
| 45                                  | 1.19                   | 17.25                                     | 70.71     | 14.51 ( 14.35 )              |
| 60                                  | 1.17                   | 17.52                                     | 67.79     | 13.92 ( 13.62 )              |
| 120                                 | 1.15                   | 16.39                                     | 70.33     | 13.31 ( 12.97 )              |

<sup>a</sup>Annealing at 320 °C for 10 min;

<sup>b</sup>Data in parentheses stand for the average PCEs for 10 cells.

**Table S3** Effect of annealing temperature for CsPbI<sub>2.4</sub>Br<sub>0.6</sub> layer on performance of CsPbI<sub>2.4</sub>Br<sub>0.6</sub> solar cells.<sup>a</sup>

| Annealing<br>temperature<br>[°C] | $V_{\text{oc}}$<br>[V] | $J_{\text{sc}}$<br>[mA cm <sup>-2</sup> ] | FF<br>[%] | PCE<br>[%]                   |
|----------------------------------|------------------------|-------------------------------------------|-----------|------------------------------|
| 280                              | 1.15                   | 14.08                                     | 69.00     | 11.20 ( 10.71 ) <sup>b</sup> |
| 300                              | 1.20                   | 17.43                                     | 69.28     | 14.45 ( 14.08 )              |
| 320                              | 1.20                   | 17.50                                     | 72.75     | 15.21 ( 15.05 )              |
| 350                              | 1.20                   | 16.31                                     | 66.90     | 13.11 ( 12.96 )              |

<sup>a</sup>30  $\mu\text{L}/\text{mL}$  TBAB in precursor solution; annealing for 10 min.

<sup>b</sup>Data in parentheses stand for the average PCEs for 10 cells.

**Table S4** Effect of annealing time for CsPbI<sub>2.4</sub>Br<sub>0.6</sub> layer on performance of CsPbI<sub>2.4</sub>Br<sub>0.6</sub> solar cells.<sup>a</sup>

| Annealing time<br>[min] | $V_{oc}$<br>[V] | $J_{sc}$<br>[mA cm <sup>-2</sup> ] | FF<br>[%] | PCE<br>[%]                   |
|-------------------------|-----------------|------------------------------------|-----------|------------------------------|
| 0                       | 1.11            | 16.19                              | 72.18     | 12.99 ( 12.78 ) <sup>b</sup> |
| 5                       | 1.20            | 17.49                              | 68.51     | 14.38 ( 14.05 )              |
| 10                      | 1.20            | 17.50                              | 72.75     | 15.21 ( 15.05 )              |
| 20                      | 1.19            | 16.99                              | 71.16     | 14.37 ( 14.08 )              |
| 30                      | 1.16            | 16.57                              | 71.24     | 13.69 ( 13.43 )              |
| 60                      | 1.10            | 16.18                              | 72.40     | 12.92 ( 12.77 )              |

<sup>a</sup>30  $\mu$ L/mL TBAB in precursor solution; annealing at 320 °C.

<sup>b</sup>Data in parentheses stand for the average PCEs for 10 cells.

**Table S5** A summary of the detail performance parameters of reported inorganic perovskite (PVSK) solar cells.

| Perovskite (PVSK)  | Device structure                                             | $V_{oc}$<br>[V] | $J_{sc}$<br>[mA cm <sup>-2</sup> ] | FF<br>[%] | PCE<br>[%] | Ref.                                         |
|--------------------|--------------------------------------------------------------|-----------------|------------------------------------|-----------|------------|----------------------------------------------|
| CsPbI <sub>3</sub> | FTO/TiO <sub>2</sub> /PVSK/Spiro-OMeTAD/Ag                   | 0.66            | 11.92                              | 52.47     | 4.13       | J. Phys. Chem. Lett. 2016, 7, 3603           |
| CsPbI <sub>3</sub> | FTO/TiO <sub>2</sub> /PVSK/P3HT/MoO <sub>3</sub> /Au         | 0.74            | 10.48                              | 61        | 4.68       | Sol. Energy Mater. Sol. Cells 2016, 144, 532 |
| CsPbI <sub>3</sub> | ITO/TiO <sub>2</sub> /PVSK/P3HT/Au                           | 1.06            | 13.8                               | 67.7      | 10.5       | J. Phys. Chem. Lett. 2017, 8, 67             |
| CsPbI <sub>3</sub> | FTO/TiO <sub>2</sub> /PVSK/Spiro-OMeTAD/Au                   | 1.11            | 14.88                              | 65        | 10.74      | Nat. Commun. 2018, 9, 1076                   |
| CsPbI <sub>3</sub> | FTO/TiO <sub>2</sub> /PVSK/Spiro-OMeTAD/MoO <sub>3</sub> /Al | 1.23            | 13.47                              | 65        | 10.77      | Science 2016, 354, 92                        |

|                       |                                                              |      |       |       |       |                                     |
|-----------------------|--------------------------------------------------------------|------|-------|-------|-------|-------------------------------------|
| CsPbI <sub>3</sub>    | FTO/TiO <sub>2</sub> /PVSK/P3HT/Au                           | 1.04 | 16.53 | 65.7  | 11.3  | J. Am. Chem. Soc. 2018, 140, 11716  |
| CsPbI <sub>3</sub>    | ITO/PTAA/PVSK/PCBM/C <sub>60</sub> /BCP/Cathode              | 1.08 | 14.9  | 70    | 11.4  | Joule 2017, 1, 371                  |
| CsPbI <sub>3</sub>    | FTO/TiO <sub>2</sub> /PVSK/Spiro-OMeTAD/Ag                   | 1.15 | 14.53 | 71    | 11.86 | Sci. Adv. 2017, 3, e1700841         |
| CsPbI <sub>3</sub>    | ITO/SnO <sub>2</sub> /PVSK/Spiro-OMeTAD/Au                   | 1.07 | 16.59 | 70    | 12.4  | Joule 2018, 2, 1356                 |
| CsPbI <sub>3</sub>    | FTO/TiO <sub>2</sub> /PVSK/PTB7/MoO <sub>3</sub> /Ag         | 1.27 | 12.39 | 80    | 12.55 | Joule 2018, 2, 2450                 |
| CsPbI <sub>3</sub>    | FTO/TiO <sub>2</sub> /PVSK/Spiro-OMeTAD/MoO <sub>x</sub> /Al | 1.20 | 14.37 | 78    | 13.4  | Sci. Adv. 2017, 3, eaao4204         |
| CsPbI <sub>3</sub>    | FTO/TiO <sub>2</sub> /PVSK/PTAA/Au                           | 1.06 | 18.95 | 74.9  | 15.07 | Nat. Commun. 2018, 9, 4544          |
| CsPbI <sub>3</sub>    | ITO/SnO <sub>2</sub> /PVSK/Spiro-OMeTAD/Au                   | 1.08 | 18.41 | 79.32 | 15.71 | Nat. Commun. 2018, 9, 2225          |
| CsPbI <sub>3</sub>    | FTO/TiO <sub>2</sub> /PVSK/Spiro-OMeTAD/Ag                   | 1.1  | 19.15 | 80.6  | 17.06 | J. Am. Chem. Soc. 2018, 140, 12345  |
| CsPbI <sub>2</sub> Br | FTO/NiMgLiO/PVSK/PCBM/BCP/Ag                                 | 0.98 | 14.18 | 66    | 9.14  | Materials Today Energy 2018, 8, 125 |
| CsPbI <sub>2</sub> Br | FTO/TiO <sub>2</sub> /PVSK/Spiro-OMeTAD/Ag                   | 1.11 | 11.89 | 75    | 9.84  | Adv. Energy Mater. 2016, 6, 1502458 |
| CsPbI <sub>2</sub> Br | ITO/SnO <sub>2</sub> /PVSK/Carbon                            | 1.19 | 12.91 | 66.1  | 10.13 | J. Phys. Chem. Lett. 2019, 10, 194  |
| CsPbI <sub>2</sub> Br | ITO/NiO <sub>x</sub> /PVSK/C <sub>60</sub> /BCP/Ag           | 1.05 | 12.6  | 78.7  | 10.4  | Adv. Energy Mater. 2018, 1800758    |
| CsPbI <sub>2</sub> Br | FTO/TiO <sub>2</sub> /PVSK/Spiro-OMeTAD/Au                   | 1.23 | 12    | 73    | 10.7  | J. Phys. Chem. Lett. 2017, 8, 2936  |
| CsPbI <sub>2</sub> Br | FTO/TiO <sub>2</sub> /PVSK/Spiro-OMeTAD/Ag                   | 1.17 | 13.98 | 74    | 12    | Adv. Energy Mater. 2018, 8, 1801050 |
| CsPbI <sub>2</sub> Br | FTO/TiO <sub>2</sub> /PVSK/PTAA/Au                           | 1.19 | 12.93 | 80.5  | 12.39 | Adv. Energy Mater. 2018, 8, 1703246 |
| CsPbI <sub>2</sub> Br | ITO/SnO <sub>2</sub> /PVSK/Spiro-OMeTAD/Ag                   | 1.06 | 15.99 | 77.12 | 13.09 | ACS Photonics 2018, 5, 4104         |

|                                        |                                                                                            |      |       |       |       |                                      |
|----------------------------------------|--------------------------------------------------------------------------------------------|------|-------|-------|-------|--------------------------------------|
| CsPbI <sub>2</sub> Br                  | FTO/NiO <sub>x</sub> /PVSK/ZnO@C <sub>60</sub> /Ag                                         | 1.14 | 15.2  | 77    | 13.3  | J. Am. Chem. Soc. 2018, 140, 3825    |
| CsPbI <sub>2</sub> Br                  | FTO/TiO <sub>2</sub> /PVSK/Spiro-OMeTAD/Au                                                 | 1.18 | 14.89 | 77.23 | 13.54 | Adv. Sci. 2018, 5, 1801117           |
| CsPbI <sub>2</sub> Br                  | FTO/NiO <sub>x</sub> /PVSK/ZnO@C <sub>60</sub> /Ag                                         | 1.14 | 15.7  | 77    | 13.74 | Adv. Energy Mater. 2018, 9, 1803572  |
| CsPbI <sub>2</sub> Br                  | FTO/TiO <sub>2</sub> /PVSK/FA <sup>+</sup> CsPbX <sub>3</sub> /FA <sup>+</sup> QDs/PTAA/Au | 1.22 | 14.51 | 79.6  | 14.12 | Adv. Sci. 2018, 5, 1801123           |
| CsPbI <sub>2</sub> Br                  | FTO/TiO <sub>2</sub> /PVSK/CsPbI <sub>3</sub> QDs/PTAA/Au                                  | 1.2  | 15.25 | 78.7  | 14.45 | Joule 2018, 2, 1500                  |
| CsPbI <sub>2</sub> Br                  | ITO/SnO <sub>2</sub> /ZnO/PVSK/Spiro-OMeTAD/MoO <sub>3</sub> /Ag                           | 1.23 | 15    | 78.8  | 14.6  | Adv. Mater. 2018, 30, 1802509        |
| CsPbI <sub>2</sub> Br                  | FTO/TiO <sub>2</sub> /PVSK/Spiro-OMeTAD/Au                                                 | 1.22 | 15.33 | 78.7  | 14.78 | Adv. Funct. Mater. 2018, 28, 1803269 |
| CsPbI <sub>2</sub> Br                  | FTO/TiO <sub>2</sub> /PVSK/FA <sup>+</sup> CsPbX <sub>3</sub> /FA <sup>+</sup> QDs/PTAA/Au | 1.22 | 15.1  | 80.3  | 14.81 | Nano Energy 2018, 52, 408            |
| CsPbI <sub>2</sub> Br                  | FTO/c-TiO <sub>2</sub> /PVSK/Spiro-OMeTAD/Au                                               | 1.23 | 16.79 | 77.81 | 16.07 | Joule 2018, 3, 191                   |
| CsPbI <sub>2</sub> Br                  | ITO/SnO <sub>2</sub> /PN4N/CsPbI <sub>2</sub> Br/PDCBT/MoO <sub>3</sub> /Ag                | 1.30 | 15.3  | 81.5  | 16.2  | Adv. Mater. 2019, 1901152            |
| CsPbI <sub>1.2</sub> Br <sub>1.8</sub> | FTO/TiO <sub>2</sub> /PVSK/PTAA/Au                                                         | 1.33 | 9.7   | 64    | 8.2   | Adv. Energy Mater. 2018, 8, 1802060  |
| CsPbI <sub>1.5</sub> Br <sub>1.5</sub> | FTO/TiO <sub>2</sub> /PVSK/PTAA/Au                                                         | 1.28 | 11    | 65    | 9.1   | Adv. Energy Mater. 2018, 8, 1802060  |
| CsPbI <sub>1.8</sub> Br <sub>1.2</sub> | FTO/TiO <sub>2</sub> /PVSK/PTAA/Au                                                         | 1.29 | 12.3  | 65    | 10.3  | Adv. Energy Mater. 2018, 8, 1802060  |
| CsPbIBr <sub>2</sub>                   | FTO/TiO <sub>2</sub> /PVSK/Au                                                              | 0.96 | 8.7   | 56    | 4.7   | Adv. Energy Mater. 2016, 6, 1502202  |
| CsPbIBr <sub>2</sub>                   | FTO/NiO <sub>x</sub> /PVSK/ZnO/Al                                                          | 1.01 | 8.65  | 63.6  | 5.57  | Nat. Mater. 2018, 17, 261            |
| CsPbIBr <sub>2</sub>                   | FTO/TiO <sub>2</sub> /PVSK/Carbon                                                          | 0.96 | 12.15 | 53    | 6.14  | Adv. Energy Mater. 2018, 8, 1800504  |

|                      |                                                             |      |       |       |      |                                            |
|----------------------|-------------------------------------------------------------|------|-------|-------|------|--------------------------------------------|
| CsPbIBr <sub>2</sub> | FTO/c-TiO <sub>2</sub> /PVSK/Carbon                         | 1.14 | 9.11  | 63    | 6.55 | ACS Appl. Energy Mater. 2018, 1, 4991      |
| CsPbIBr <sub>2</sub> | ITO/SnO <sub>2</sub> /PVSK/Carbon                           | 1.23 | 8.5   | 67    | 7    | J. Mater. Chem. A, 2019, 7, 1227           |
| CsPbIBr <sub>2</sub> | ITO/SnO <sub>2</sub> /C <sub>60</sub> /PVSK/Spiro-OMeTAD/Au | 1.18 | 8.32  | 74.8  | 7.34 | Adv. Energy Mater. 2018, 8, 1800525        |
| CsPbIBr <sub>2</sub> | FTO/TiO <sub>2</sub> /PVSK/Carbon                           | 1.08 | 12.32 | 62    | 8.25 | J. Am. Chem. Soc. 2017, 139, 14009         |
| CsPbIBr <sub>2</sub> | FTO/c-TiO <sub>2</sub> /PVSK/Carbon                         | 1.25 | 10.66 | 69    | 9.16 | Adv. Energy Mater. 2018, 8, 1802080        |
| CsPbBr <sub>3</sub>  | FTO/TiO <sub>2</sub> /PVSK/Carbon                           | 1.29 | 5.7   | 68    | 5    | ACS Appl. Mater. Interfaces 2016, 8, 33649 |
| CsPbBr <sub>3</sub>  | FTO/TiO <sub>2</sub> /PVSK/Spiro-OMeTAD/Au                  | 1.5  | 5.6   | 62    | 5.4  | Nat. Energy 2016, 2, 16194                 |
| CsPbBr <sub>3</sub>  | FTO/TiO <sub>2</sub> /PVSK/PTAA/Au                          | 1.25 | 6.7   | 73    | 6.2  | J. Phys. Chem. Lett. 2016, 7, 167          |
| CsPbBr <sub>3</sub>  | FTO/TiO <sub>2</sub> /PVSK/Carbon                           | 1.24 | 7.4   | 73    | 6.7  | J. Am. Chem. Soc. 2016, 138, 15829         |
| CsPbBr <sub>3</sub>  | FTO/ZnO/PVSK/Spiro-OMeTAD/Au                                | 1.43 | 6.17  | 77.2  | 6.81 | ACS Appl. Mater. Interfaces 2018, 10, 7145 |
| CsPbBr <sub>3</sub>  | ITO/ZnO/PVSK/Spiro-OMeTAD/Au                                | 1.44 | 7.01  | 77.11 | 7.78 | Adv. Mater. 2018, 30, 1800855              |
| CsPbBr <sub>3</sub>  | FTO/TiO <sub>2</sub> /CQD/PVSK/Spiro-OMeTAD/Ag              | 1.06 | 11.34 | 69    | 8.29 | Adv. Mater. 2017, 29, 1703682              |
| CsPbBr <sub>3</sub>  | FTO/TiO <sub>2</sub> /PVSK/Carbon                           | 1.52 | 7.35  | 84.3  | 9.43 | Angew. Chem. Int. Ed. 2018, 57, 5746       |
| CsPbBr <sub>3</sub>  | FTO/TiO <sub>2</sub> /PVSK/Carbon                           | 1.46 | 8.12  | 82.1  | 9.72 | Angew. Chem. Int. Ed. 2018, 57, 3787       |

|                                                 |                                                                                   |      |       |       |       |                                     |
|-------------------------------------------------|-----------------------------------------------------------------------------------|------|-------|-------|-------|-------------------------------------|
| $\text{CsPb}_{0.97}\text{Sm}_{0.03}\text{Br}_3$ | FTO/c-TiO <sub>2</sub> /m-TiO <sub>2</sub> /PVSK/carbon                           | 1.59 | 7.48  | 85.1  | 10.14 | Adv. Energy Mater. 2018, 8, 1802346 |
| $\text{CsPb}_{0.97}\text{Tb}_{0.03}\text{Br}_3$ | FTO/c-TiO <sub>2</sub> /m-TiO <sub>2</sub> /PVSK/SnS:ZnS/NiO <sub>x</sub> /carbon | 1.57 | 8.21  | 79.6  | 10.26 | J. Mater. Chem. A, 2018, 6, 24324   |
| $\text{CsPbBr}_3$                               | FTO/SQE36/CsPbBr <sub>3</sub> /CsSnBr <sub>3</sub> /carbon                        | 1.61 | 7.8   | 84.4  | 10.6  | Sol. RRL 2019, 3, 1800284           |
| $\text{CsPbI}_{2.4}\text{Br}_{0.6}$             | ITO/SnO <sub>2</sub> /ZnO/PVSK/PTAA/MoO <sub>3</sub> /Ag                          | 1.20 | 17.50 | 72.75 | 15.21 | this work                           |

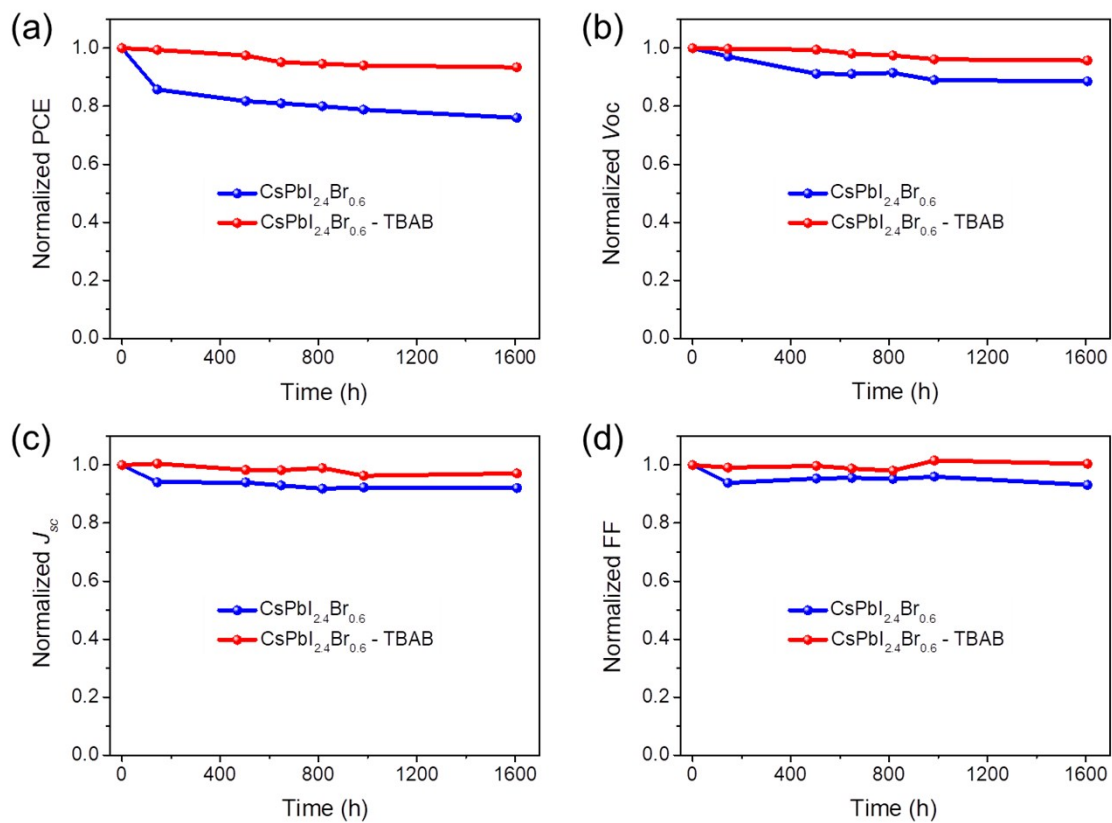

**Fig. S11** The normalized (a) PCE, (b)  $V_{oc}$ , (c)  $J_{sc}$ , and (d) FF for CsPbI<sub>2.4</sub>Br<sub>0.6</sub> and CsPbI<sub>2.4</sub>Br<sub>0.6</sub> - TBAB based PSCs as a function of storage time in a N<sub>2</sub> glovebox.

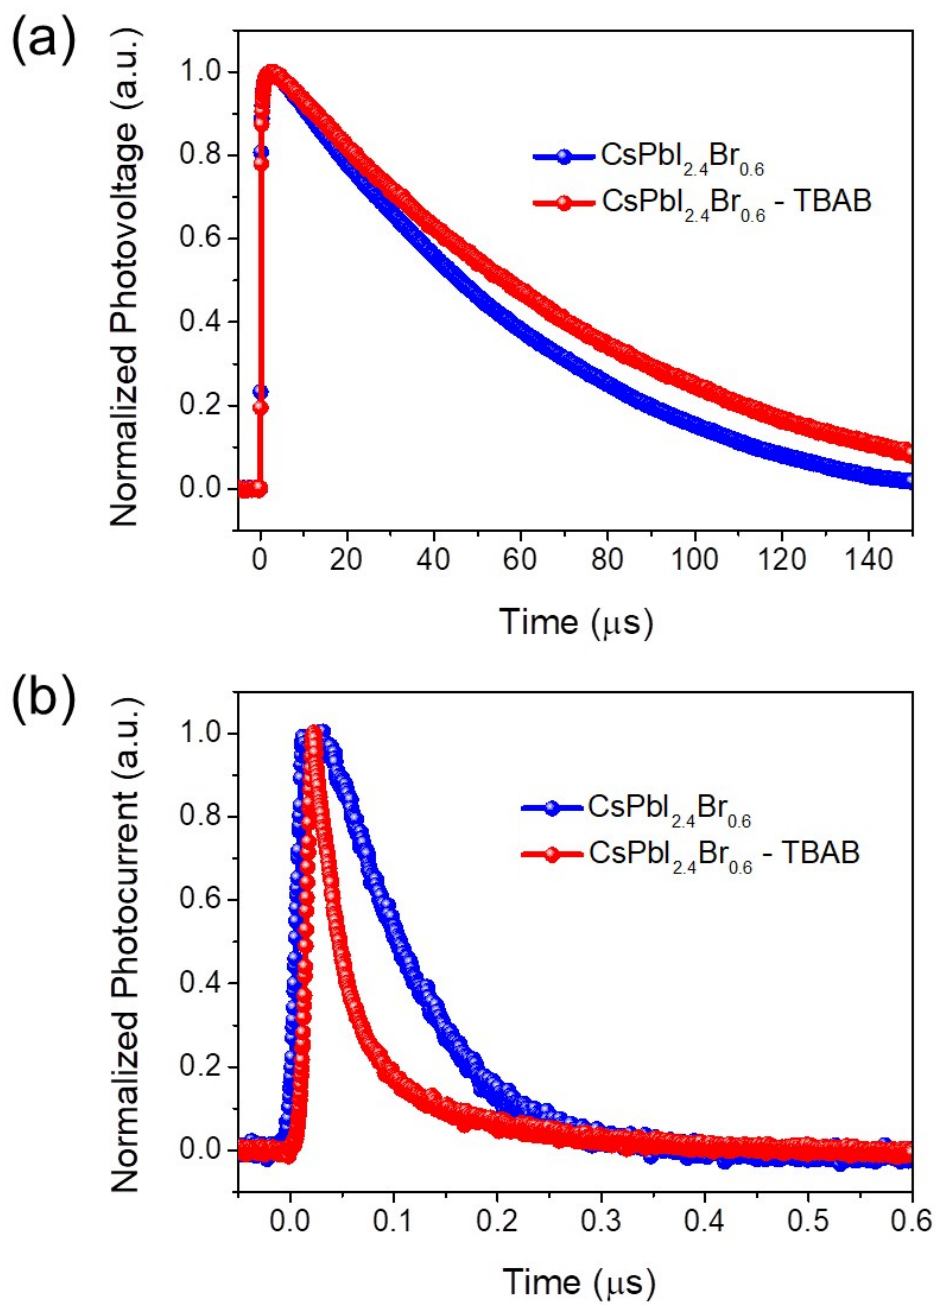

**Fig. S12** TPV and TPC for  $\text{CsPbI}_{2.4}\text{Br}_{0.6}$  and  $\text{CsPbI}_{2.4}\text{Br}_{0.6}$  - TBAB based PSCs.
